# Supplementary material for: Storm-Surge Induced Water Level Changes in the Odra River Mouth Area (Southern Baltic Coast)
Source: MDPI journal article supplement (doi:10.3390/atmos12121559), 2021-11-25
Supplement: s1 [file s1]

# Supplementary Materials

**Table S1.** Water level stations in the Odra River mouth area and their specific long-term water levels over the period 2008/2009–2019/2020.

| Station                | Station code | Location <sup>1</sup>                                                  | Gauge null datum <sup>2</sup> | Min (cm) | Max (cm) | Range (cm) | STD (cm) |
|------------------------|--------------|------------------------------------------------------------------------|-------------------------------|----------|----------|------------|----------|
| Świnoujście            | SW           | Pomeranian Bay, at 2.3 km of the Świnoujście-Szczecin Fairway          | +3.20                         | −132     | 136      | 266        | 20.3     |
| Dziwnów                | DZ           | Outlet of the Dziwna Strait into Pomeranian Bay                        | −0.95                         | −113     | 116      | 220        | 19.4     |
| Trzebież               | TR           | Szczecin Lagoon, at 36.5 km of the Świnoujście-Szczecin Fairway        | −5.00                         | −93      | 115      | 208        | 18.4     |
| Wolin                  | WL           | Outlet of the Dziwna Strait into Szczecin Lagoon                       | −5.00                         | −86      | 102      | 186        | 18       |
| Szczecin (Long Bridge) | MD           | At 37 km of Western Odra = 66.5 km of the Świnoujście-Szczecin Fairway | −5.00                         | −92      | 119      | 209        | 19.3     |
| Szczecin (Podjuchy)    | PD           | Eastern Odra, at 734 km of the Odra Waterway                           | −5.01                         | −95      | 127      | 221        | 20.3     |
| Gryfino                | GR           | Eastern Odra, at 718.5 km of the Odra Waterway                         | −5.00                         | −80      | 130      | 209        | 22.9     |
| Widuchowa              | WD           | At 701.8 km of the Odra Waterway                                       | −5.00                         | −113     | 219      | 331        | 34.3     |
| Bielinek               | BL           | At 672.5 km of the Odra Waterway                                       | −5.00                         | −162     | 375      | 537        | 93.6     |
| Gozdowice              | GZ           | At 645.3 km of the Odra Waterway                                       | −5.00                         | −145     | 301      | 446        | 78.4     |

<sup>1</sup>source: [18]

<sup>2</sup>source: [8], the Normall-Null (NN) ordnance datum

Min – the difference between minimum and mean values in years 2008/09 to 2019/20

Max – the difference between maximum and mean values in years 2008/09 to 2019/20

STD - standard deviation

**Table S2.** Principal component loadings (PC), eigenvalues and percentage of explained variance for water levels in the Odra River mouth area

| Station    | PC1 <sup>1</sup> | PC2          |
|------------|------------------|--------------|
| SW         | <b>−0.846</b>    | −0.349       |
| DZ         | <b>−0.868</b>    | −0.373       |
| TR         | <b>−0.956</b>    | −0.233       |
| WL         | <b>−0.943</b>    | −0.248       |
| MD         | <b>−0.977</b>    | −0.111       |
| PD         | <b>−0.970</b>    | 0.037        |
| GR         | <b>−0.918</b>    | 0.306        |
| WD         | −0.663           | 0.692        |
| BL         | −0.226           | <b>0.952</b> |
| GZ         | −0.203           | <b>0.947</b> |
| Eigenvalue | 6.544            | 2.767        |

|                                   |       |       |
|-----------------------------------|-------|-------|
| Explained variance (%)            | 65.44 | 27.67 |
| Explained cumulative variance (%) | 65.44 | 93.11 |

Note: 1bold font denotes values exceeding 0.7

Table S3. Principal component loadings (PC), eigenvalues and percentage of explained variance for water levels in the Odra River mouth area during the periods with exceeded alarm level at Świnoujście

| Station                           | PC1 <sup>1</sup> | PC2          | PC3           |
|-----------------------------------|------------------|--------------|---------------|
| SW                                | −0.362           | −0.211       | <b>−0.809</b> |
| DZ                                | −0.621           | 0.029        | −0.626        |
| TR                                | <b>−0.965</b>    | −0.188       | 0.104         |
| WL                                | <b>−0.959</b>    | −0.124       | 0.042         |
| MD                                | <b>−0.975</b>    | −0.140       | 0.110         |
| PD                                | <b>−0.962</b>    | −0.157       | 0.135         |
| GR                                | <b>−0.977</b>    | 0.030        | 0.162         |
| WD                                | <b>−0.821</b>    | 0.425        | 0.206         |
| BL                                | −0.172           | <b>0.978</b> | −0.064        |
| GZ                                | −0.103           | <b>0.981</b> | −0.124        |
| Eigenvalue                        | 5.914            | 2.242        | 1.178         |
| Explained variance (%)            | 59.14            | 22.42        | 11.78         |
| Explained cumulative variance (%) | 59.14            | 81.56        | 93.34         |

Note: 1bold font denotes values exceeding 0.7

Table S4. Principal component loadings (PC), eigenvalues and percentage of explained variance for water levels in the Odra River mouth area during the October 2009 storm surge

| Station                           | A                |              | B            |              |
|-----------------------------------|------------------|--------------|--------------|--------------|
|                                   | PC1 <sup>1</sup> | PC2          | PC1          | PC2          |
| SW                                | 0.670            | −0.607       | <b>0.871</b> | −0.257       |
| DZ                                | <b>0.796</b>     | −0.505       | <b>0.869</b> | −0.312       |
| TR                                | <b>0.993</b>     | −0.003       | <b>0.991</b> | −0.041       |
| WL                                | <b>0.984</b>     | 0.015        | <b>0.985</b> | −0.039       |
| MD                                | <b>0.995</b>     | −0.004       | <b>0.993</b> | −0.038       |
| PD                                | <b>0.994</b>     | 0.028        | <b>0.992</b> | 0.005        |
| GR                                | <b>0.989</b>     | 0.071        | <b>0.990</b> | 0.028        |
| WD                                | <b>0.982</b>     | 0.125        | <b>0.985</b> | 0.080        |
| BL                                | <b>0.807</b>     | 0.574        | <b>0.802</b> | 0.570        |
| GZ                                | 0.134            | <b>0.876</b> | 0.044        | <b>0.968</b> |
| Eigenvalue                        | 7.628            | 1.743        | 8.032        | 1.436        |
| Explained variance (%)            | 76.28            | 17.43        | 80.32        | 14.36        |
| Explained cumulative variance (%) | 76.28            | 93.7         | 80.32        | 94.68        |

Note:

A – synchronous correlations

B – correlations incorporating k=10 hour offset for SW series and k=5 hour offset for DZ series

<sup>1</sup>bold font denotes values exceeding 0.7

Table S5. Principal component loadings (PC), eigenvalues and percentage of explained variance for water levels in the Odra River mouth area during the February 2011 storm surge

| Station                           | A                |               | B             |               |
|-----------------------------------|------------------|---------------|---------------|---------------|
|                                   | PC1 <sup>1</sup> | PC2           | PC1           | PC2           |
| SW                                | 0.365            | <b>−0.839</b> | <b>−0.816</b> | −0.330        |
| DZ                                | 0.447            | <b>−0.843</b> | <b>−0.890</b> | −0.320        |
| TR                                | <b>0.967</b>     | −0.191        | <b>−0.969</b> | −0.176        |
| WL                                | <b>0.952</b>     | −0.204        | <b>−0.948</b> | −0.229        |
| MD                                | <b>0.967</b>     | −0.158        | <b>−0.972</b> | −0.122        |
| PD                                | <b>0.976</b>     | −0.066        | <b>−0.980</b> | −0.035        |
| GR                                | <b>0.950</b>     | 0.226         | <b>−0.936</b> | 0.248         |
| WD                                | <b>0.829</b>     | 0.472         | <b>−0.780</b> | 0.464         |
| BL                                | −0.648           | −0.595        | 0.383         | <b>−0.882</b> |
| GZ                                | −0.532           | −0.541        | 0.189         | <b>−0.863</b> |
| Eigenvalue                        | 6.354            | 2.443         | 6.868         | 2.111         |
| Explained variance (%)            | 63.54            | 24.43         | 68.68         | 21.11         |
| Explained cumulative variance (%) | 63.54            | 87.98         | 68.68         | 89.79         |

Note:

A – synchronous correlations

B – correlations incorporating k=7 hour offset for SW and DZ series

<sup>1</sup>bold font denotes values exceeding 0.7

Table S6. Principal component loadings (PC), eigenvalues and percentage of explained variance for water levels in the Odra River mouth area during the January 2019 storm surge

| Station                | A                |              | B             |               |
|------------------------|------------------|--------------|---------------|---------------|
|                        | PC1 <sup>1</sup> | PC2          | PC1           | PC2           |
| SW                     | −0.637           | <b>0.750</b> | <b>−0.943</b> | 0.236         |
| DZ                     | <b>−0.707</b>    | 0.689        | <b>−0.876</b> | 0.373         |
| TR                     | <b>−0.983</b>    | −0.062       | <b>−0.991</b> | 0.042         |
| WL                     | <b>−0.973</b>    | −0.152       | <b>−0.983</b> | −0.050        |
| MD                     | <b>−0.989</b>    | −0.001       | <b>−0.985</b> | 0.122         |
| PD                     | <b>−0.989</b>    | −0.003       | <b>−0.985</b> | 0.118         |
| GR                     | <b>−0.990</b>    | −0.055       | <b>−0.988</b> | 0.047         |
| WD                     | <b>−0.986</b>    | −0.096       | <b>−0.985</b> | −0.004        |
| BL                     | <b>−0.892</b>    | −0.421       | <b>−0.858</b> | −0.436        |
| GZ                     | <b>−0.790</b>    | −0.289       | −0.616        | <b>−0.727</b> |
| Eigenvalue             | 8.149            | 1.336        | 8.609         | 0.949         |
| Explained variance (%) | 81.49            | 13.36        | 86.09         | 9.49          |

---

|                                   |       |       |       |       |
|-----------------------------------|-------|-------|-------|-------|
| Explained cumulative variance (%) | 81.49 | 94.85 | 86.09 | 95.58 |
|-----------------------------------|-------|-------|-------|-------|

---

Note:

A – synchronous correlations

B – correlations incorporating k=11 hour offset for SW series and k=8 hour offset for DZ series

<sup>1</sup>bold font denotes values exceeding 0.7
